# Supplementary material for: Origin of the effects of PEG additives in electrolytes on the performance of quantum dot sensitized solar cells
Source: Royal Society of Chemistry journal article supplement (doi:10.1039/c8ra05794j), 2018-01-01
Supplement: c8ra05794j1.pdf [file c8ra05794j1.pdf]

## Supplementary Information (SI)

### Origin of the effect of PEG additives in electrolyte on the performance of Quantum Dots Sensitized Solar Cells

Han Song,<sup>†</sup> Huashang Rao,<sup>†</sup> Yu Sun,<sup>†,‡</sup> Guocan Jiang,<sup>‡</sup> Mengsi Zhou,<sup>†,‡</sup> Liang Yue,<sup>†,‡</sup> Zhenxiao Pan,<sup>\*,†</sup> and Xinhua Zhong<sup>\*,†</sup>

<sup>†</sup>College of Materials and Energy, South China Agricultural University, 483 Wushan Road, Guangzhou 510642, China.

<sup>‡</sup>Key Laboratory for Advanced Materials, Institute of Applied Chemistry, East China University of Science and Technology, Shanghai 200237, China.

Corresponding Author Email:

zxpan@scau.edu.cn (for Z. P.)

zhongxh@ecust.edu.cn (for X. Z.)

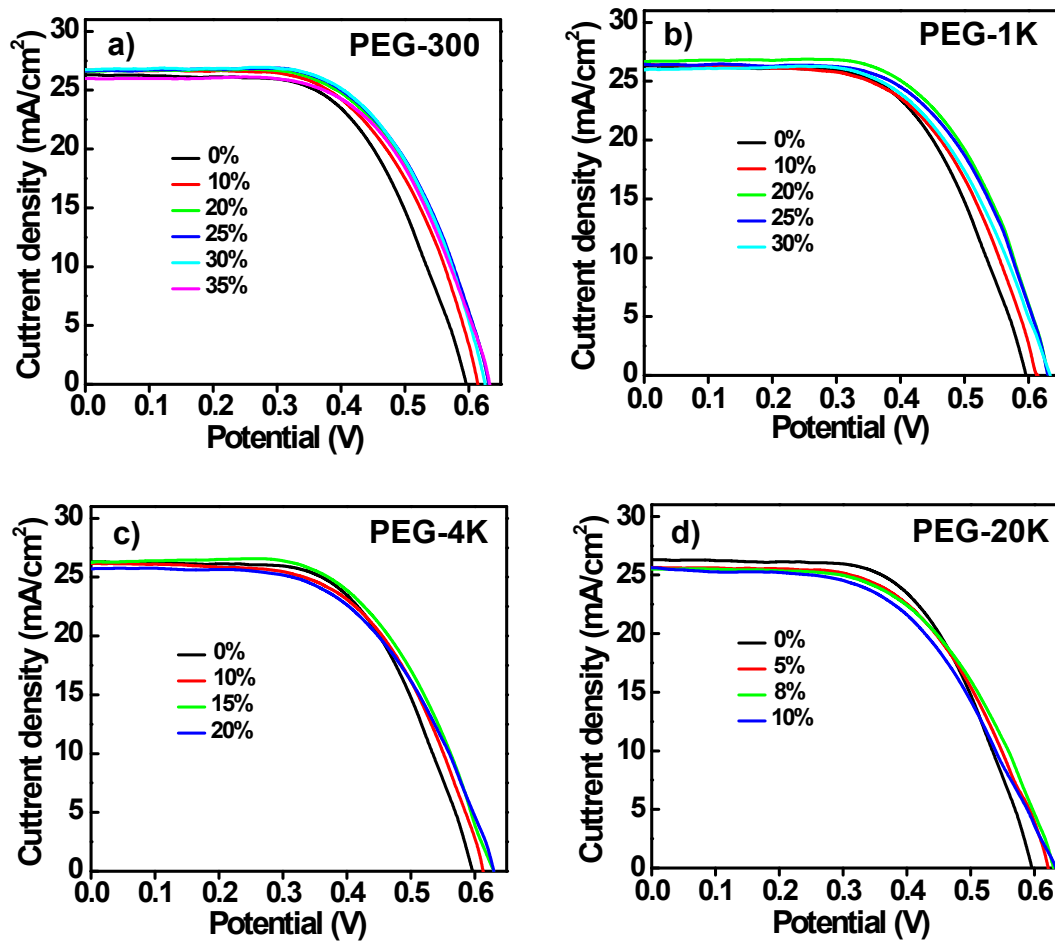

Fig. S1.  $J$ - $V$  curves of ZCISE QDSCs corresponding to PEG additives with different concentrations: a) PEG-300, b) PEG-1K, c) PEG-4K, and d) PEG-20K, under the illumination of 1 full sun intensity (AM 1.5G,  $100 \text{ mW}/\text{cm}^2$ ).

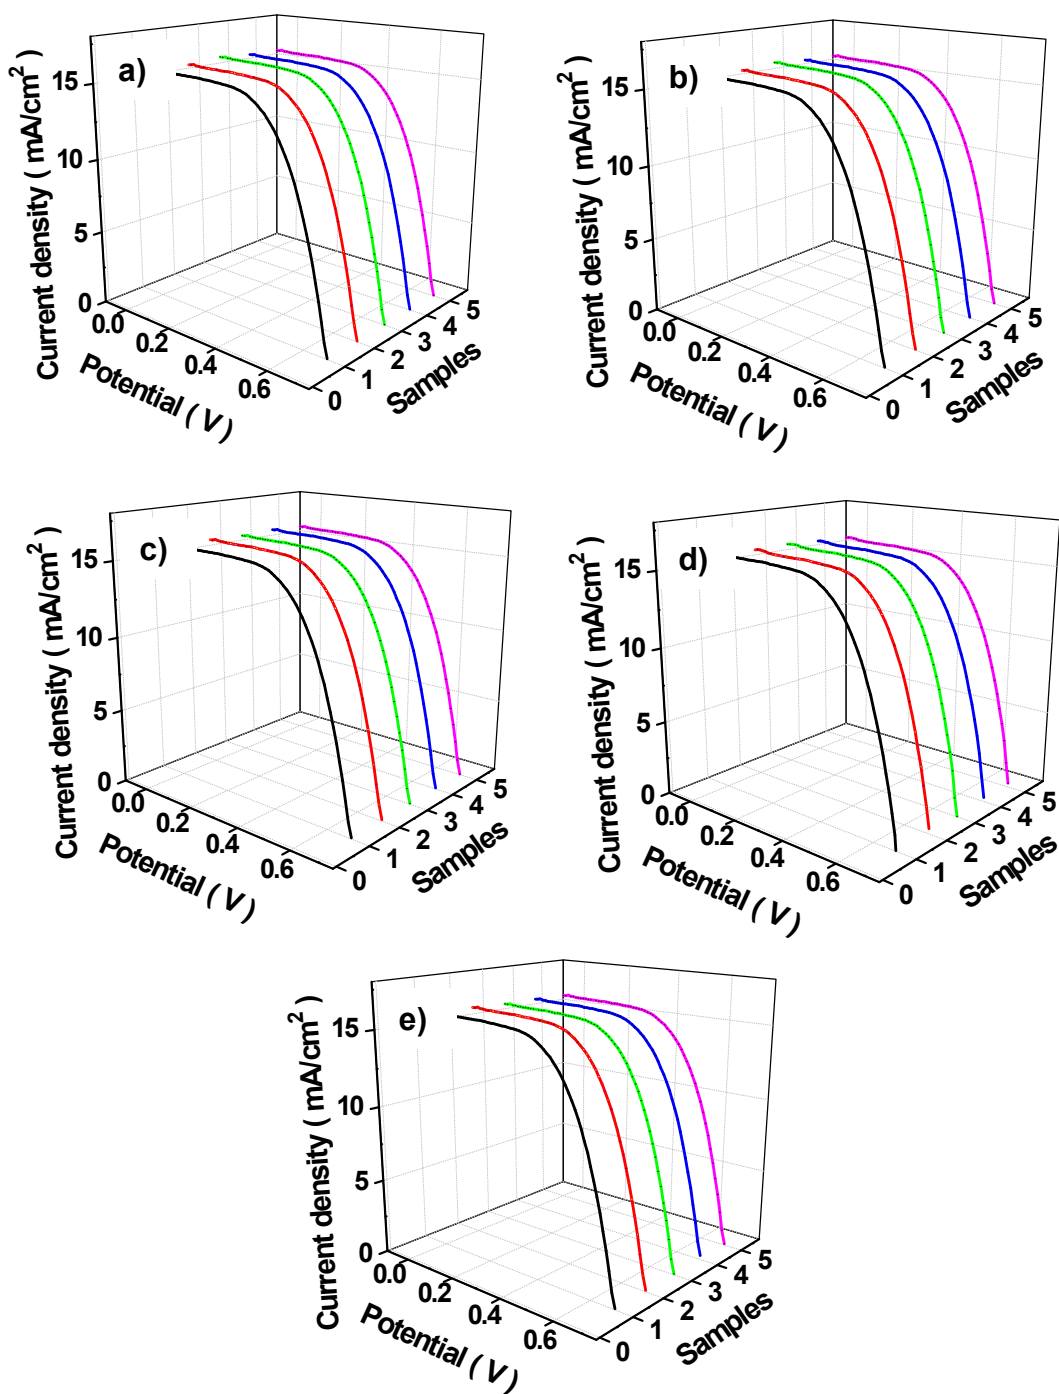

**Fig. S2.**  $J$ - $V$  curves of CdSe QDSCs corresponding to polysulfide electrolyte containing various amount PEG-300 under the illumination of 1 full sun intensity (AM 1.5G, 100 mW/cm<sup>2</sup>).

**Table S1.** Photovoltaic performance of CdSe QDSCs with different PEG additives modified electrolyte under AM 1.5G illumination.

| PEG additives | $J_{sc}$ (mA·cm <sup>-2</sup> ) | $V_{oc}$ (V)   | FF (%)      | PCE (%)      |
|---------------|---------------------------------|----------------|-------------|--------------|
| Ref           | 15.80                           | 0.650          | 66.3        | 6.81         |
|               | 15.90                           | 0.653          | 65.8        | 6.83         |
|               | 16.03                           | 0.648          | 67.2        | 6.98         |
|               | 15.70                           | 0.660          | 65.5        | 6.79         |
|               | 15.60                           | 0.658          | 65.0        | 6.67         |
| average       | 15.81 ± 0.17                    | 0.654 ± 0.005  | 66 ± 0.8    | 6.81 ± 0.11  |
| PEG-300       | 15.92                           | 0.694          | 69.2        | 7.65         |
|               | 15.71                           | 0.685          | 68.5        | 7.37         |
|               | 15.67                           | 0.695          | 69.4        | 7.56         |
|               | 15.78                           | 0.678          | 71.2        | 7.62         |
|               | 15.50                           | 0.690          | 70.4        | 7.53         |
| average       | 15.72 ± 0.15                    | 0.688 ± 0.007  | 69.7 ± 1.1  | 7.54 ± 0.11  |
| PEG-1K        | 16.05                           | 0.692          | 68.2        | 7.57         |
|               | 15.52                           | 0.695          | 70.1        | 7.56         |
|               | 15.93                           | 0.682          | 70.2        | 7.63         |
|               | 15.80                           | 0.690          | 70.3        | 7.66         |
|               | 15.70                           | 0.694          | 69.4        | 7.56         |
| average       | 15.8 ± 0.20                     | 0.691 ± 0.005  | 69.6 ± 0.88 | 7.6 ± 0.05   |
| PEG-4K        | 15.66                           | 0.688          | 69.3        | 7.46         |
|               | 16.00                           | 0.679          | 68.5        | 7.47         |
|               | 15.82                           | 0.680          | 68.8        | 7.40         |
|               | 15.87                           | 0.688          | 67.9        | 7.46         |
|               | 15.85                           | 0.689          | 69.4        | 7.50         |
| average       | 15.84 ± 0.12                    | 0.685 ± 0.005  | 68.8 ± 0.6  | 7.50 ± 0.04  |
| PEG-20K       | 15.56                           | 0.692          | 68.9        | 7.46         |
|               | 16.04                           | 0.678          | 68.2        | 7.45         |
|               | 15.84                           | 0.682          | 68.3        | 7.43         |
|               | 15.79                           | 0.690          | 67.9        | 7.40         |
|               | 15.90                           | 0.685          | 68.3        | 7.58         |
| average       | 15.83 ± 0.17                    | 0.685 ± 0.0057 | 68.3 ± 0.36 | 7.38 ± 0.068 |

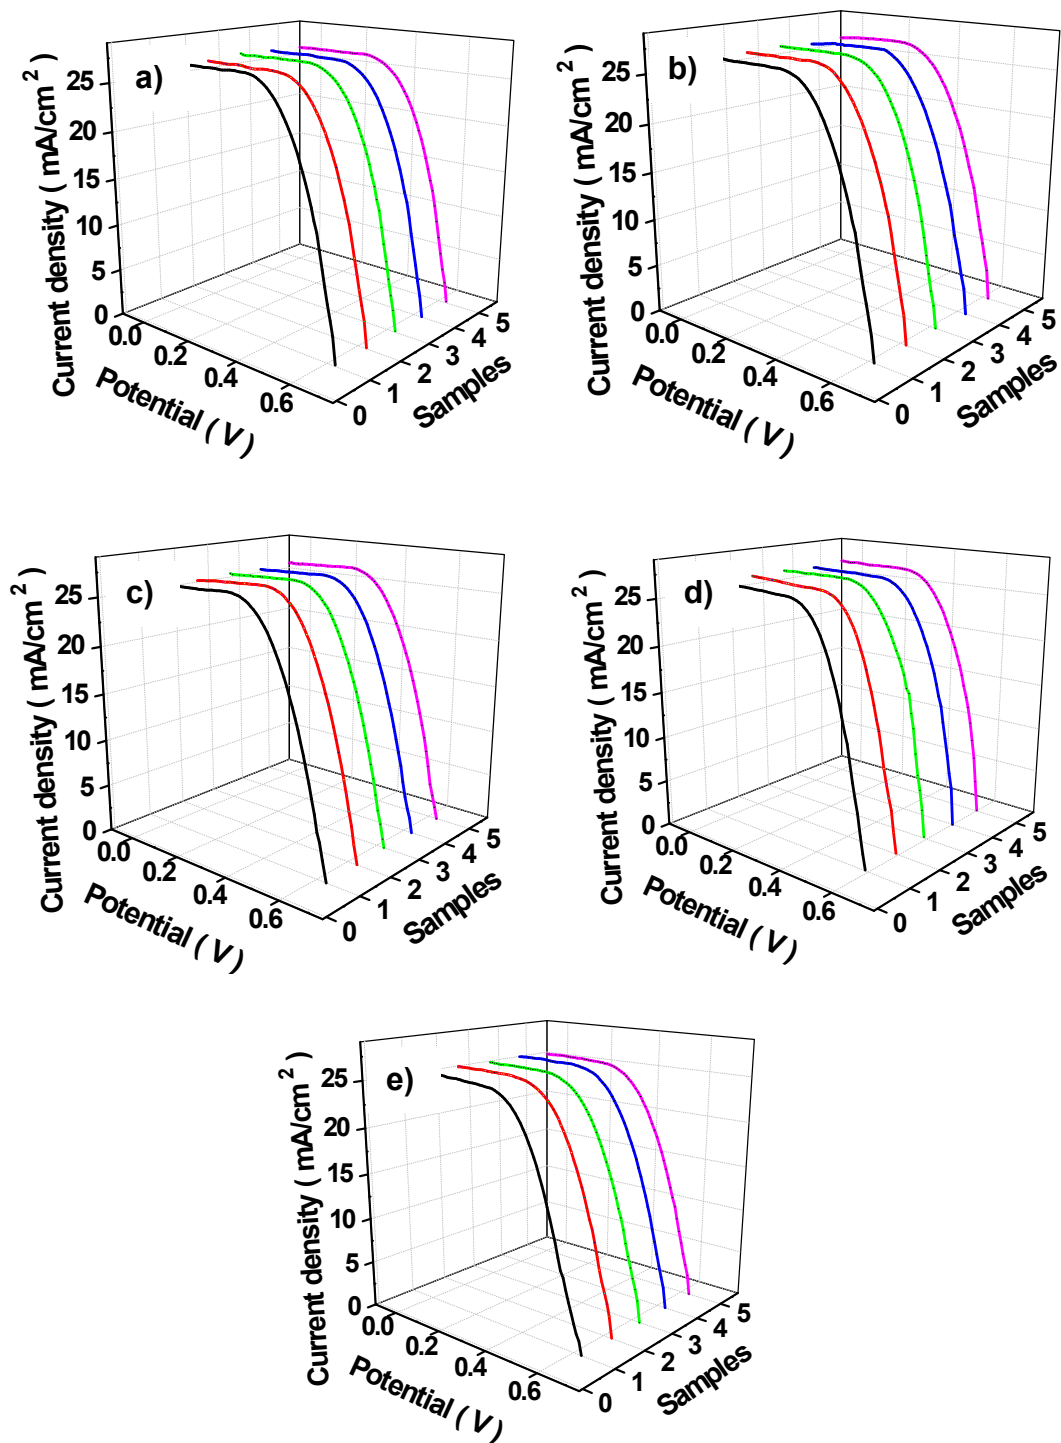

**Fig. S3.**  $J$ - $V$  curves of ZCISe QDSCs corresponding to different PEG additives: a) Ref, b) PEG-300, c) PEG-1K, d) PEG-4K, and f) PEG-20K, modified polysulfide electrolyte under the illumination of 1 full sun intensity (AM 1.5G, 100 mW/cm<sup>2</sup>):

**Table S2.** Photovoltaic performance of ZCISe QDSCs with different PEG additives modified electrolyte under AM 1.5G illumination.

| PEG additives | $J_{sc}$ (mA·cm <sup>-2</sup> ) | $V_{oc}$ (V) | FF (%)    | PCE (%)    |
|---------------|---------------------------------|--------------|-----------|------------|
| Ref           | 26.80                           | 0.590        | 58.3      | 9.22       |
|               | 26.42                           | 0.593        | 59.8      | 9.37       |
|               | 26.23                           | 0.598        | 58.2      | 9.13       |
|               | 26.70                           | 0.588        | 59.5      | 9.34       |
|               | 26.60                           | 0.588        | 59.0      | 9.23       |
| average       | 26.55±0.23                      | 0.591±0.004  | 58.96±0.7 | 9.26±0.10  |
| PEG-300       | 26.82                           | 0.633        | 60.2      | 10.22      |
|               | 26.61                           | 0.626        | 60.5      | 10.08      |
|               | 26.37                           | 0.627        | 61.4      | 10.15      |
|               | 26.68                           | 0.628        | 61.2      | 10.25      |
|               | 26.43                           | 0.630        | 62.0      | 10.32      |
| average       | 26.58±0.18                      | 0.629±0.003  | 61.06±0.7 | 10.20±0.09 |
| PEG-1K        | 26.14                           | 0.632        | 61.0      | 10.08      |
|               | 26.62                           | 0.625        | 61.1      | 10.17      |
|               | 26.83                           | 0.628        | 60.2      | 10.14      |
|               | 26.71                           | 0.630        | 60.3      | 10.15      |
|               | 26.52                           | 0.624        | 61.6      | 10.19      |
| average       | 26.56±0.26                      | 0.628±0.003  | 60.8±0.6  | 10.15±0.04 |
| PEG-4K        | 25.99                           | 0.634        | 58.1      | 9.68       |
|               | 25.91                           | 0.633        | 59.0      | 9.61       |
|               | 26.02                           | 0.626        | 58.9      | 9.60       |
|               | 26.00                           | 0.628        | 58.7      | 9.59       |
|               | 26.24                           | 0.630        | 58.2      | 9.62       |
| average       | 26.03±0.12                      | 0.630±0.003  | 58.6±0.4  | 9.62±0.03  |
| PEG-20K       | 25.56                           | 0.632        | 56.3      | 9.09       |
|               | 25.74                           | 0.628        | 55.5      | 8.97       |
|               | 25.84                           | 0.632        | 56.8      | 9.28       |
|               | 25.79                           | 0.625        | 56.9      | 9.17       |
|               | 24.82                           | 0.635        | 57.4      | 9.05       |
| average       | 25.55±0.42                      | 0.630±0.004  | 56.6±0.7  | 9.11±0.12  |

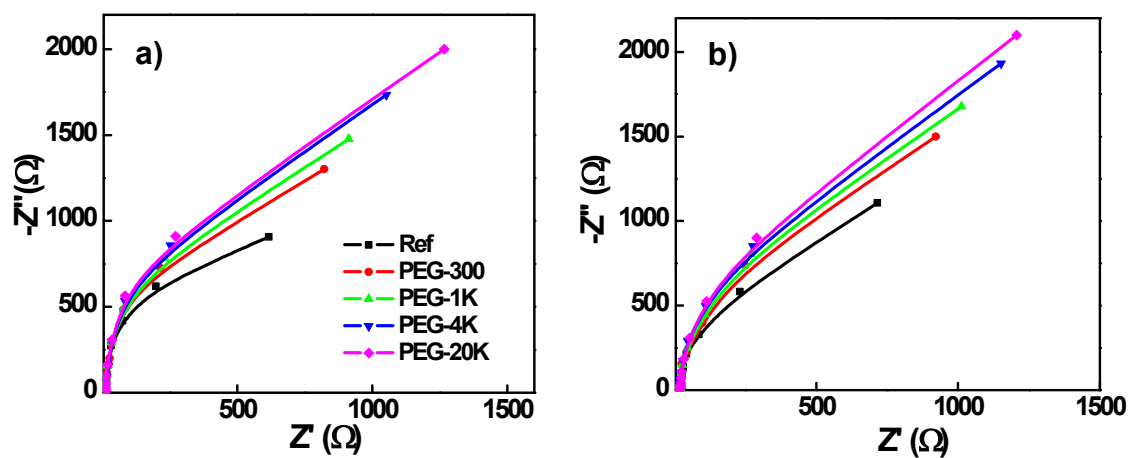

**Fig. S4.** Electrochemical characterizations of Nyquist plots under forward bias of  $-0.35$  V for QDSCs corresponding to electrolyte containing different PEG additives: (a) CdSe QDSCs, (b) ZCISe QDSCs.

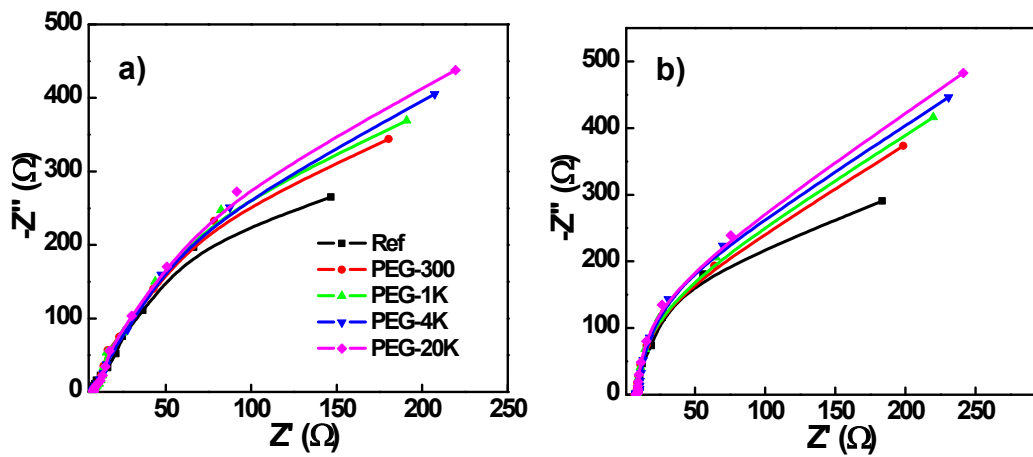

**Fig. S5.** Electrochemical characterizations of Nyquist plots under forward bias of  $-0.45$  V for QDSCs corresponding to electrolyte containing different PEG additives: (a) CdSe QDSCs, (b) ZCISe QDSCs.



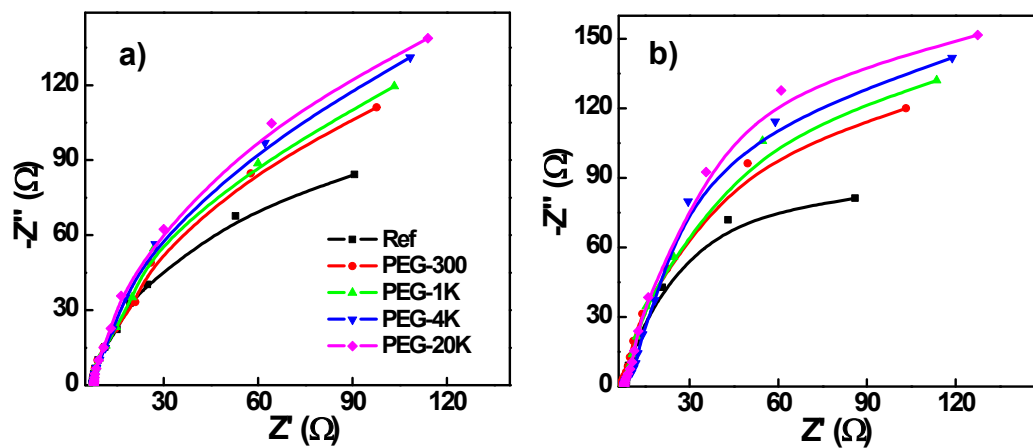

**Fig. S6.** Electrochemical characterizations of Nyquist plots under forward bias of  $-0.55$  V for QDSCs corresponding to electrolyte containing different PEG additives: (a) CdSe QDSCs, (b) ZCISe QDSCs.
